# Supplementary material for: Prognostic utility of serial procalcitonin measurements in ICU sepsis: a laboratory-led modelling approach in a resource-limited setting procalcitonin modelling for sepsis mortality in a low-resource ICU
Source: publisher site journal article supplement (doi:10.1515/cclm-2025-0778), 2025-11-11
Supplement: Supplementary file 1 [file j_cclm-2025-0778_suppl_001.docx]

**Supplementary materials**

**Table S1. Model fit statistics for latent class mixed models (LCMM) of procalcitonin trajectories.**

| **Model** | **AIC** | **BIC** | **Entropy** | **Interpretability** |
| --- | --- | --- | --- | --- |
| One-class | 1585.5 | 1596.3 | - | No subgroups |
| Two-class | 1537.0 | 1560.5 | 0.64 | Low and rising |
| Three-class | 1508.9 | 1544.1 | 0.70 | Low and stable, high then declining, rising |
| Four-class | 1501.7 | 1548.6 | 1.00 | Overfitting; small class size |

**Supplementary Note: latent class model selection**

To identify the optimal number of PCT trajectory classes, we compared LCMMs with 1 to 4 classes using several model selection criteria:

- Akaike Information Criterion (AIC) and Bayesian Information Criterion (BIC) evaluate model fit while penalising complexity. Lower values indicate a better balance between accuracy and simplicity. BIC applies a stronger penalty for overfitting and is commonly prioritised in model selection.
- Entropy measures how clearly patients are assigned to trajectory classes. It ranges from 0 to 1, with values above 0.65 generally considered acceptable. Higher entropy suggests more distinct, well-separated trajectory groups.
- Interpretability was also considered. Models were favoured if they produced biologically meaningful patterns without overfitting or yielding very small subgroups.

While the 4-class model yielded the lowest AIC, it demonstrated signs of overfitting. One class contained only two patients, and the model assigned subjects to classes with an artificially high classification certainty (relative entropy = 1). This pattern suggests artificial separation driven by outlier trajectories rather than robust biological subgroups. We therefore selected the 3-class model as the optimal balance of model fit, parsimony, and interpretability.

**Table S2. Logistic regression analysis of baseline inflammatory markers for 28-day mortality (n=371)**

| **Variable** | **Univariable OR (95% CI)** | **p-Value** | **Multivariable aOR (95% CI)** | **p-Value** |
| --- | --- | --- | --- | --- |
| PCT (log scale) | 2.52 (1.72 – 3.77) | <0.001 | 1.26 (1.10 – 1.44) | 0.001 |
| CRP, mg/L | 1.02 (0.90 – 1.15) | 0.78 | 1.01 (0.91 – 1.13) | 0.83 |
| WCC, x109/L | 1.01 (0.99 – 1.03) | 0.38 | 1.01 (0.98 – 1.03) | 0.46 |
| Age, per year | - | - | 1.03 (1.01 – 1.04) | <0.001 |
| Sex, male | - | - | 1.27 (0.69 – 2.31) | 0.45 |
| HIV positive | - | - | 1.27 (0.76 – 2.11) | 0.36 |
| AKI | - | - | 1.25 (0.82 – 1.89) | 0.30 |

PCT was log-transformed prior to analysis.

OR: odds ratio, CI: confidence interval, aOR: adjusted odds ratio, PCT: procalcitonin, CRP: c-reactive protein, WCC: white cell count, HIV: human immunodeficiency virus, AKI: acute kidney injury

**Table S3. Association between procalcitonin slope and 28-day mortality (n=139)**

| **Variable** | **Adjusted odds ratio (95% CI)** | **p-Value** |
| --- | --- | --- |
| PCT slope (log scale) | 3.56 (0.95 – 13.35) | 0.06 |
| Age, per year | 1.02 (0.99 – 1.05) | 0.11 |
| Sex, male | 1.43 (0.61 – 3.31) | 0.41 |
| HIV positive | 1.82 (0.91 – 3.64) | 0.08 |
| AKI | 1.80 (0.89 – 3.65) | 0.10 |

PCT slope calculated per patient using linear regression on log-transformed PCT over time.

CI: confidence interval, PCT: procalcitonin, HIV: human immunodeficiency virus, AKI: acute kidney injury
